1  
2  
3  
4  
5  
6  
7  
8  
9  
10  
11  
12  
13  
14  
15  
16  
17  
18  
19  
20

The permeability of red blood cells to chloride, urea, and water

Jesper Brahm

Department of Cellular and Molecular Medicine

The Faculty of Health, University of Copenhagen, DK-2200 Copenhagen N, Denmark

Corresponding address: [jbrahm@sund.ku.dk](mailto:jbrahm@sund.ku.dk); tel.: +45-35327568

21

**SUMMARY**

22 This study extends permeability ( $P$ , cm s<sup>-1</sup>) data on chloride, urea, and water in red  
23 blood cells (RBC), and concludes that the urea transporter (UT-B) does not transport  
24 water.  $P$  of chick, duck, *Amphiuma means*, dog, and human RBC to <sup>36</sup>Cl<sup>-</sup>, <sup>14</sup>C-urea, and  
25 <sup>3</sup>H<sub>2</sub>O was determined under self-exchange conditions. At 25°C, pH 7.2-7.5  $P_{Cl} \times 10^4$  is  
26 0.94-2.15 (all RBC species,  $C_{Cl} = 127$ -150 mM).  $P_{urea} \times 10^6$  is 0.84 (chick) and 1.65  
27 (duck) at  $C_{urea}$  1-500 mM. In *Amphiuma*, dog, and human RBC  $P_{urea}$  is concentration-  
28 dependent (1-1000 mM, Michaelis-Menten-like kinetics;  $K_{1/2}$  respectively 127, 173, 345  
29 mM).  $P_{urea} \times 10^6$  ( $C_{urea} = 1$  mM) is 29.5 (*Amphiuma*), 467 (dog), and 260 (human). Dif-  
30 fusional water permeability  $P_d \times 10^3$  is 0.84 (chick), 5.95 (duck), 0.39 (*Amphiuma*), 3.13  
31 (dog), and 2.35 (human). DIDS, DNDS, and phloretin inhibit  $P_{Cl} > 99\%$ . PCMBS,  
32 PCMB, and phloretin inhibit  $P_{urea} > 99\%$  in *Amphiuma*, dog, and human, but not in  
33 chick and duck RBC. PCMB and PCMBS inhibit  $P_d$  in duck, dog, and human, but not in  
34 chick and *Amphiuma* RBC. Temperature dependence,  $E_A$ , kJ mol<sup>-1</sup>, of  $P_{Cl}$  is 117.8  
35 (duck), 74.9 (*Amphiuma*), and 89.6 (dog).  $E_A$  of  $P_{urea}$  is 69.6 (duck), and 53.3 (*Am-*  
36 *phiuma*).  $E_A$  of  $P_d$  is 34.9 (duck) and 32.1 (*Amphiuma*). Our present and previous RBC  
37 studies indicate that anion (AE1), urea (UT-B), and water (AQP1) transporters respec-  
38 tively only transport chloride (all species), water (duck, dog, human), and urea (*Am-*  
39 *phiuma*, dog, human). Water does not share UT-B with urea, and the solute transport is  
40 not coupled under physiological conditions.

41

42 Keywords: erythrocytes, red cells, RBC, chloride, urea, water permeability, separate  
43 pathways

44

**INTRODUCTION**

45 Studies of red cell membrane transport have contributed considerably to different hy-  
46 potheses of how water and small solutes cross the biological membrane. Sidel and  
47 Solomon (1957) reported that the osmotic water permeability,  $P_f$  cm s<sup>-1</sup>, in human RBC  
48 was larger than the diffusional water permeability,  $P_d$  cm s<sup>-1</sup> (Paganelli and Solomon,  
49 1957). A  $P_f$  greater than  $P_d$  indicates that the membrane contains pores, and the ratio  $P_f$   
50 : $P_d$  was interpreted as a measure of the width of the pores in the so-called “Equivalent  
51 pore theory” (Solomon, 1968). The pores were assumed to accommodate transport of  
52 water, small nonelectrolytes such as urea, and even anions (Brown et al., 1975;  
53 Poznansky et al., 1976; Solomon et al., 1983). We questioned the concept in a study of  
54 chick RBC and a preliminary qualitative study of RBC from different species (Brahm  
55 and Wieth, 1977; Wieth and Brahm, 1977). Galey and Brahm (1985) showed that after a  
56 proper correction for both  $P_f$  and  $P_d$  related to the lipid phase of the red cell membrane,  
57 the pore according to the equivalent pore theory should accommodate even inulin that  
58 cannot permeate the membrane. Finkelstein (1987) suggested that the ratio  $P_f$  : $P_d$  de-  
59 termines the length of the pore accommodating water molecules in support of Macey  
60 and Farmer’s statement (1970) “It would appear that water channels transport water and  
61 very little else” in human RBC. It is generally accepted that the water transporting  
62 channel in the red cell membrane (aquaporin 1, AQP1) is a specific, or orthodox, water  
63 transporter. In other cells and cell systems other AQPs appear to create common path-  
64 ways to water and several other solutes (see e.g. Borgnia et al., 1999; Verkman and Mi-  
65 tra, 2000; Wu and Beitz, 2007; Litman et al., 2009; Oliva et al., 2010; Zeuthen, 2010).

66 Yang and Verkman (1998) re-advanced that water and urea share a pathway in  
67 common in RBC and that the pathway is the abundant urea transporter UT-B (syno-  
68 nyms: UT3, UT11). They further concluded that UT-B was as efficient as AQP1 to  
69 transport water in RBC. Sidoux-Walter et al., (1999) questioned the conclusion of the  
70 expression studies in oocytes by Yang and Verkman (1998) because they found no in-  
71 crease in water permeability when UT-B was expressed at physiological levels. The  
72 critique was opposed in a study of RBC from double knockout mice (Yang and Verk-  
73 man, 2002) and continued by Levin et al. (2007).

74 The present study has two goals: It extends the general characterisation of chlo-  
75 ride, urea, and water transport in RBC from different species, and it uses a comparative

76 approach to elucidate whether UT-B in RBC creates a common pathway to urea and  
77 water. Inspired by earlier works (Jacobs, 1931; Jacobs et al., 1950) the present study, in  
78 combination with our previous studies (Brahm and Wieth, 1977; Brahm, 1977, 1982,  
79 1983b) compares chloride, urea, and water permeability of RBC from chick, duck,  
80 salamander (*Amphiuma means*), dog, and human. Both previous and present results  
81 were obtained with the same techniques and are, therefore, directly comparable. The  
82 conclusion of the present study is that UT-B in intact RBC does not function as a com-  
83 mon pathway that couples urea and water transport.

84

## 85 MATERIALS AND METHODS

86

### Blood samples and reagents

87 Heparinised blood samples from chicks (white leghorn or white Plymouth Rock), ducks  
88 (mallards), salamanders (*Amphiuma means*, from Carolina Biological Supply Company,  
89 Burlington, N.C.), dogs (beagles), and humans were taken by venepuncture of a wing  
90 vein (birds), a foreleg (dogs), a forearm (humans), or by heart puncture (salamanders).  
91 Blood drawing was done according to the relevant ethical guidelines (all species) at the  
92 time of the experiment and after informed consent (humans). The blood was washed  
93 once in the proper medium to remove the plasma and buffy coat of white cells. Next, the  
94 cells were washed at least three additional times and titrated to the desired pH at the  
95 temperature of the experiments. After the last wash, the cells were suspended to a  
96 haematocrit of ~50 % and incubated at room temperature with radioactive isotopes  
97 (<sup>3</sup>H<sub>2</sub>O, [<sup>14</sup>C]urea, <sup>36</sup>Cl<sup>-</sup> or [<sup>3</sup>H]inulin; Amersham Radiochemical Centre; ~18 kBq (0.5  
98 μCi) pr. ml cell suspension). The cell suspension was gently stirred >6 half-times at  
99 room temperature to ensure equilibrium (except the extracellular marker [<sup>3</sup>H]inulin) of  
100 <sup>3</sup>H<sub>2</sub>O, [<sup>14</sup>C]urea or <sup>36</sup>Cl<sup>-</sup> across the cell membrane,.

101

102

### Media

103 The media used were (mM): A. 145 NaCl (or KCl), 1.5 CaCl<sub>2</sub>, 1 MgCl<sub>2</sub>, 5 d-glucose, 27  
104 glycyl-glycine. B. 150 KCl, 5 d-glucose, 27 glycyl-glycine. C. 150 KCl, 0.5 (or 2)  
105 KH<sub>2</sub>PO<sub>4</sub>. D. 118 NaCl, 2.5 KCl, 1.8 CaCl<sub>2</sub>, 10 MOPS, 1 d-glucose, 0.1% albumen. Urea  
106 1-1000 mM was added for urea flux experiments. The media were titrated to pH 7.2-7.5  
107 at the temperature of the expewriments with 0.1 M of either NaOH, KOH or HCl. Me-

108 dia A-C were used for experiments with RBC from chicks, ducks, dogs, and humans.  
109 Medium D was used for experiments with salamander RBC.

110

### 111 **Inhibitors**

112 Phloretin (Sigma-Aldrich, Denmark) was dissolved in ethanol (25 mM) and added to  
113 the medium to give a final concentration of 0.5 mM. Incubation with 4,4'-  
114 diisothiocyanostilbene-2,2'-disulfonate (DIDS, Sigma-Aldrich, Denmark) was carried  
115 out analogous to the procedure used for complete (>99%) and irreversible inhibition of  
116 anion transport at room temperature (Brahm, 1977). Inhibition with the reversible anion  
117 transport inhibitor 4,4'-dinitrostilbene-2,2'-disulfonate (DNDS, Sigma-Aldrich, Den-  
118 mark) was carried out as described by Fröhlich and Gunn (1987). RBC were also treated  
119 with 1 mM of the sulfhydryl-reacting reagents *p*-chloromercuribenzoate and *p*-  
120 chloromercuribenzosulfonate (PCMB and PCMBS, Sigma-Aldrich, Denmark) for 45  
121 min at 38°C. During the incubation period the cell suspension was washed three times  
122 with the incubation medium. In all experiments with inhibitors the efflux medium con-  
123 tained the inhibitor at the concentration concerned.

124

### 125 **Determination of radioactivity, cell surface area, cell volume, and cell water con-** 126 **tent**

127 The radioactivity in cell samples, supernatants, and efflux media was determined by  $\beta$ -  
128 liquid scintillation counting. Solute transport in RBC is conveniently related to the  
129 amount of dried cell solids (if necessary corrected for extra solid contents at high solute  
130 concentrations as in the present study at urea concentrations >100 mM) and thus to the  
131 same number of RBC and a constant membrane area, if RBC are from the same species.  
132 Since cell surface area and volume vary among the species in the present study the  
133 measured transport rates are converted to permeability coefficients (see below). The cell  
134 volume,  $V$ , contains ~33% solids, primarily haemoglobin. Cell water volume,  $V_w$ , de-  
135 pends on pH and temperature and was determined as described previously (Brahm,  
136 1977) by drying samples of packed RBC (haematocrit 97-98%) to constant weight at  
137 105°C for 24 hours and correcting for extracellular medium trapped between the cells by  
138 the centrifugation. The extracellular marker [<sup>3</sup>H]inulin was used to determine the ex-  
139 tracellular volume that amounted to 2-3% in all species.

140 Table 1 summarises “standard values” of  $V$ ,  $A$ , and the ratio of cell water volume  
 141  $V_w$  to  $A$ , as determined in previous studies of chick, dog, and human RBC (Wieth et al.,  
 142 1974; Brahm and Wieth, 1977). I calculated  $A$  of duck RBC using data from Gulliver  
 143 (1875) as we did for chick RBC (Brahm and Wieth, 1977). The duck RBC is an oval  
 144 nucleated cell with axes  $13.1 \mu\text{m} \times 7.4 \mu\text{m}$  and a thickness of  $1 \mu\text{m}$  of the non-nucleated  
 145 part of the cell. Duck RBC  $V$  was calculated to be  $\sim 175$  femtoliter as 1 kg of cell dried  
 146 solids equals  $14.7 \times 10^{12}$  cells (Lytle et al., 1998), and normal cells contain 1.55-1.57  
 147 litre cell water per kg cell dried solids (Lytle and McManus, 2002; the present study).  
 148 *Amphiuma* RBC  $V$  and  $V_w A^{-1}$  were calculated from  $V_w = 0.682$  (w/w) (Siebens and  
 149 Kregenow, 1985; the present study),  $A = 5000 \mu\text{m}^2 \text{ cell}^{-1}$ , and  $4.7 \times 10^{11}$  cells (kg cell  
 150 dried solids)<sup>-1</sup> (Cala, 1980).

151

### 152 **Measurements of tracer efflux rates**

153 The rate of tracer efflux under self-exchange conditions from the radioactive labelled  
 154 RBC was determined by means of the Millipore-Swinnex filtering technique and the  
 155 continuous flow tube method in the temperature range 0-40°C (Dalmark and Wieth,  
 156 1972; Brahm, 1977, 1989). By combining the two methods efflux rate coefficients as  
 157 high as  $k \sim 230 \text{ s}^{-1}$  ( $T_{1/2} \sim 3 \text{ ms}$ ) can be determined (Brahm, 1983a). The principles of the  
 158 two methods are the same. In short a small volume of packed and radioactive labelled  
 159 RBC is suspended in a much larger volume of a non-labelled electrolyte medium, giving  
 160 a suspension with a haematocrit  $< 1\%$ . At determined times cell-free filtrates are col-  
 161 lected from the suspension. The increase of extracellular radioactivity with time in the  
 162 series of filtrates is determined by  $\beta$ -liquid scintillation counting.

163

### 164 **Calculations**

165 The experimental setup is considered as a closed two-compartment model with constant  
 166 volumes. The extracellular volume is  $> 100$  times larger than the intracellular volume,  
 167 and the flow of tracer is very close to a unidirectional tracer efflux because the tracer  
 168 flux back into the cells is ignorable. The kinetics of tracer efflux follows first order ki-  
 169 netics in accordance with the equation (Brahm, 1982):

$$\frac{a_t - a_\infty}{a_0 - a_\infty} = e^{-k t} \quad (1)$$

170  $a_t$  and  $a_{\infty}$  are the radioactive solute concentrations at time  $t$  and infinite respectively,  
 171 and  $a_0$  is the radioactivity in the dilute cell suspension at  $t=0$ . The rate coefficient  $k$  ( $s^{-1}$ )  
 172 was determined by linear regression analysis as the numerical value of the slope of the  
 173 curve in a semilogarithmic plot in which the logarithmic ordinate expresses the fraction  
 174 of tracer in the cells at a given time (left hand side of Eqn. 1) and the abscissa is time  
 175 (cf. Figs. 1, 2, and 4). The rate coefficient  $k$  is related to the half-time  $T_{1/2}$  (s) of the efflux  
 176 by:

$$T_{1/2} = \frac{\ln 2}{k} \quad (2)$$

177  $k$  is set equal to the rate coefficient of the non-labelled compound, i.e. there is no iso-  
 178 tope effect (see Brahm and Wieth, 1977). Hence, the higher  $k$ , the steeper is the efflux  
 179 curve, and the shorter is  $T_{1/2}$ . The permeability  $P$  ( $cm\ s^{-1}$ ) is related to  $k$  by:

$$P = k \times \frac{V_w}{A} \quad (3)$$

180 Chloride transport in RBC from human has been studied most extensively and shows  
 181 complicated saturation kinetics. Both  $k$  and  $P$  depend in a complex manner on the intra-  
 182 cellular and extracellular chloride concentrations and the asymmetric affinities of chlo-  
 183 ride to the transporter (see e.g. Knauf and Brahm, 1989; Gasbjerg et al., 1996; Knauf et  
 184 al., 1996). The concentration dependent (“apparent”)  $P_{Cl}$  was determined under equilib-  
 185 rium conditions with fixed extracellular chloride concentrations of 127 (*Amphiuma*) or  
 186 150 (chick, duck, dog, and human) mM where the transport system is almost completely  
 187 saturated in human RBC. The narrow concentration interval allows comparing  $P_{Cl}$  of the  
 188 different species.

189 Urea transport in *Amphiuma*, dog, and human RBC also shows saturation kinetics  
 190 under self-exchange conditions. The saturation of urea transport, however, is kinetically  
 191 less complicated and may be described in terms of Michaelis-Menten like kinetics  
 192 where the apparent permeability coefficient  $P_{urea}$  is expressed by:

$$P_{urea} = \frac{J_{urea}^{max}}{K_{1/2} + C} \quad (4)$$

193  $J_{urea}^{max}$  ( $mmol\ cm^{-2}\ s^{-1}$ ) is the maximum urea flux, and  $K_{1/2}$  (mM) is the half saturation  
 194 constant (see e.g. Brahm, 1983b).

195 The apparent activation energy,  $E_A$  (cal mol<sup>-1</sup>), of  $P$  in the temperature range 0-  
196 40°C was calculated by linear regression analysis of the relation:

$$\ln P = -\frac{E_A}{R} \times \frac{1}{T} + \text{const.} \quad (5)$$

197  $R$  is the gas constant (1.99 cal (mol K)<sup>-1</sup>),  $T$  is the absolute temperature (K), and  $E_A$  is  
198 determined from the slope of the curve.

199

200

## RESULTS

201

### Chloride transport

202 Fig. 1 shows the <sup>36</sup>Cl<sup>-</sup> efflux curves under self-exchange conditions in RBC at an ex-  
203 tracellular chloride concentration of 150 mM (chick, duck, dog, and human) and 127  
204 mM (*Amphiuma*). For comparison, the figure shows efflux curves at 25°C that is the  
205 physiological temperature to *Amphiuma*, while the physiological temperatures are 37-  
206 40°C of the other four species. The rate coefficients were used to calculate  $P_{Cl}$  at the  
207 given chloride concentrations (cf. Eqns. 1-3, Table 2). The efflux curve of dog RBC  
208 (dashed line) was determined by interpolation of the data obtained at 38°C and 0°C and  
209 an  $E_A$  of 89.6 kJ mol<sup>-1</sup>, cf. Table 3 that also summarises  $E_A$  of  $P_{Cl}$  of duck RBC (4-40°C)  
210 and *Amphiuma* RBC (5-30°C).

211

212

### Urea transport

213 Urea transport in chick RBC is as low as in lipid bilayer membranes, while in human  
214 RBC it is high and saturates (Brahm and Wieth, 1977; Brahm, 1983b). The present  
215 study confirms and extends our earlier studies. The efflux curves in Fig. 2 further show  
216 that duck RBC transport urea almost as slowly as chick RBC, while *Amphiuma*, dog,  
217 and human RBC transport urea much faster. For comparison the efflux rates of urea  
218 were all determined at 1 mM urea and 25°C that is the physiological temperature for  
219 *Amphiuma*. Calculation of  $P_{urea}$  (cf. Eqn. 3) shows that  $P_{urea}$  of chick and duck is very  
220 low,  $P_{urea}$  of *Amphiuma means* is ~30 times higher, and  $P_{urea}$  of dog and human is ~300  
221 times higher (Table 2).

222 Fig. 3 depicts  $P_{urea}$  dependence on  $C_{urea}$  in RBC of the five species at 25°C.  $P_{urea}$   
223 of chick and duck RBC is concentration independent at  $C_{urea}$  =1-500 mM. In contrast,  
224  $P_{urea}$  of *Amphiuma*, dog, and human RBC decreased with increasing  $C_{urea}$  to 1000 mM



225 in accordance with the concept of saturation kinetics. Urea transport in RBC of the three  
 226 species is well described by a Michaelis-Menten like expression (Eqn. 4). Table 4 sum-  
 227 marises  $J_{urea}^{\max}$  (mmol cm<sup>-2</sup> s<sup>-1</sup>) and  $K_{1/2}$  (mM).

228 Table 3 summarises that the temperature dependence of  $P_{urea}$  in duck RBC is 69.6  
 229 kJ mol<sup>-1</sup>(4-40°C) and in *Amphiuma* RBC is 53.3 kJ mol<sup>-1</sup>(0-25°C).

230

231

### Water transport

232 Fig. 5 shows the diffusional efflux of <sup>3</sup>H<sub>2</sub>O of the five species at 25°C and pH 7.2-7.5.  
 233  $T_{1/2}$  of <sup>3</sup>H<sub>2</sub>O efflux varies from 7 ms in duck to 154 ms in *Amphiuma* RBC. The  $P_d$  val-  
 234 ues of the RBC of the five species are summarised in Table 2.  $P_d$  was determined in  
 235 RBC from two human donors whose  $P_{urea}$  varies >100% (Brahm, 1983b). Their  $P_{urea}$   
 236 and  $P_d$  values are summarised in Table 5.  $E_A$  of  $P_d$  in duck RBC with the highest  $P_d$  (4-  
 237 40°C) and *Amphiuma* with lowest  $P_d$  (5-30°C) is similar, 32-35 kJ mol<sup>-1</sup> (Table 3).

238

239

### Inhibition of solute transport

240 Table 6 summarises the inhibitory effects of DIDS, DNDS, PCMBS, PCMB, and phlo-  
 241 retin on chloride, urea, and water transport in the five red blood cell species as deter-  
 242 mined in the present and previous studies. The results (data not shown) of the present  
 243 study are from double or triple determinations of efflux rate coefficients.

244

245

## DISCUSSION

246 All procedures in the present study are well established in RBC transport studies of  
 247 widely different solutes. The time resolution of the two methods suits quite well in the  
 248 present study where  $T_{1/2}$  ranges ~10<sup>4</sup> times (cf. Figs. 1, 2, and 4) from 40 s to ~4 ms,  
 249 which is within the lower limit of the method (Brahm, 1983a). The time resolution of  
 250 the two methods overlaps (Brahm, 1977) and the combined setup is, therefore, robust to  
 251 detect even minor differences in the properties of the five red blood cell species.

252 All experiments were carried out under self-exchange conditions and osmotic  
 253 equilibrium that ensures a constant cell volume during the tracer efflux measurements.  
 254 The conditions prevent some sources of error. Firstly, as seen from Eqns. 2 and 3,  $k \times$   
 255  $V_w$  is proportional to  $P$  that is constant at a given solute concentration. If  $V_w$  changes,  $k$   
 256 changes inversely, and the efflux curves should show nonlinearity in the depictions in

257 Figs. 1, 2 and 4, bending downwards by cell shrinkage and upwards by cell swelling.  
258 Nonlinearity can be minimised if initial rates are determined by equilibrating only 10-  
259 15% of the intracellular tracer (Brahm and Galey, 1987; Gasbjerg and Brahm, 1991). In  
260 the present study the efflux curves show linearity up to 90% exit of the intracellular  
261 tracer, indicating that the tracer efflux follows a mono-exponential course. Secondly, the  
262 physiological  $V$  of the different species varies  $>40\times$  (Table 1) and possible effects of  
263 volume changes on e.g. the mechanical properties of the RBC membranes from the dif-  
264 ferent species are avoided. Thirdly, the constant  $V$  during the tracer efflux experiments  
265 prevents solvent drag effects as demonstrated for water in human RBC by Galey and  
266 Brahm (1987).

267

268

### Chloride permeability

269  $P_{Cl}$  of artificial bilayer membranes is of the order of  $1 \times 10^{-10} \text{ cm s}^{-1}$  (Toyoshima and  
270 Thompson, 1975).  $P_{Cl}$  of RBC of all species so far investigated, except Lamprey eryth-  
271 rocytes (see Nikinmaa, 1990), is  $\sim 10^6$  times higher (see e.g. Wieth et al., 1974; Jensen  
272 and Brahm, 1995; Jensen et al., 1998, 2001, 2003; Soegaard et al., 2012) and is due to a  
273 rapid anion exchange system that enhances the CO<sub>2</sub> transporting capacity of blood.  
274 Duck and *Amphiuma* RBC are no exception to that observation (Table 2). A comparison  
275 of anion transport in the different red cell species raises some issues to consider.

276 Firstly, the anion transport in human RBC is well characterised both structurally  
277 and kinetically as a saturable asymmetric transport system (AE1) with  $\sim 10^6$  copies per  
278 cell that perform a tightly coupled anion exchange (see e.g. Knauf, 1989; Jennings,  
279 1992a, 1992b; Knauf et al., 2002). The characterisation of the kinetics of anion transport  
280 in other RBC species is very incomplete. I assume that the saturation of the anion trans-  
281 porters of the different RBC species is comparable at the physiological concentrations  
282 of 127 and 150 mM used in the present study.

283 Secondly, the present study compares data obtained at 25°C. An appropriate  
284 physiological approach is to compare the anion transport in RBC at the species respec-  
285 tive "functional body temperature" (Jensen et al., 2001) that is 40°C for duck and chick,  
286 37°C for human and dog, and 25°C for *Amphiuma*. That approach gives very similar  
287 values of  $P_{Cl}$  of  $3-4 \times 10^{-4} \text{ cm s}^{-1}$  at the functional temperatures of RBC of birds and  
288 mammals that is twice the value of *Amphiuma* RBC. However, the overall conclusion

289 still holds that the RBC under study all have a transport system that increases  $P_{Cl} \sim 10^6 \times$   
 290 above a “basic”  $P$  of lipid bilayer membranes and the lipid phase of the RBC mem-  
 291 branes.

292 Thirdly, the anion transport by the RBC AE1 shows similar high  $E_A$ . At 0-40°C  
 293 both chick and human RBC show a nonlinear  $E_A$  in an Arrhenius diagram. We (Brahm  
 294 and Wieth, 1977; Brahm, 1977) simplified the findings by assuming two  $E_A$  values,  
 295 120-135 kJ mol<sup>-1</sup> at low temperatures, and 80-94 kJ mol<sup>-1</sup> in the physiological tem-  
 296 perature range. If the nonlinearity is ignored the overall  $E_A$  is  $\sim 100-110$  kJ mol<sup>-1</sup>. The  
 297 data of *Amphiuma*, dog, and human RBC (Table 3) does not allow the same distinction  
 298 as for chick and human RBC. However, the overall  $E_A$  lies in the same narrow interval.

299 Fourthly, the specific inhibitors DIDS and DNDS and the non-specific inhibitor  
 300 phloretin efficiently inhibit the anion transport in human RBC. A similar efficient inhi-  
 301 bition of anion transport in the other red cell species is also obtainable by means of the  
 302 inhibitors (Table 6).

303 The overall conclusion is that anion transport is similar in the selected RBC spe-  
 304 cies. DIDS and DNDS inhibit neither urea nor water transport in the RBC, in agreement  
 305 with that AE1 does not transport the two solutes. The conclusion from the comparative  
 306 results of urea and water transport (see below) is also that this abundant transporter *per*  
 307 *se* does not create a leak pathway to urea and water.

308

309

### Urea permeability

310  $P_{urea}$  and  $P_{thiourea}$  is  $\sim 4 \times 10^{-6}$  cm s<sup>-1</sup> at 20-28°C in different lipid bilayer membrane sys-  
 311 tems with no built-in transporters (Vreeman, 1966; Galucci et al., 1971; Poznansky et al.,  
 312 1976). Thiourea is  $\sim 10 \times$  more lipid soluble than urea (Collander and Bärlund, 1933) and  
 313 the similar  $P_{urea}$  and  $P_{thiourea}$  in artificial bilayer membrane systems underline that other  
 314 factors than the partition coefficient, such as the entrance and exit rates of the solute in the  
 315 membrane, are important. The  $P_{urea}$  and  $P_{thiourea}$  are concentration independent, in agree-  
 316 ment with a transport mode of simple diffusion through the lipid membrane phase.

317 Chick RBC have a low  $P_{urea}$ ,  $P_{thiourea}$ , and  $P_{methylurea}$  of  $\sim 1 \times 10^{-7}$  cm s<sup>-1</sup> in the con-  
 318 centration range 1-500 mM at 0°C (Brahm and Wieth, 1977) that is comparable to the  
 319 permeability in the above-cited artificial systems. At 25°C the low  $P_{urea}$  in chick RBC is  
 320  $0.84 \times 10^{-6}$  cm s<sup>-1</sup> ( $T_{1/2}$  40.8 s, Fig. 2; Table 2) that is concentration independent ( $C_{urea} = 1-$

321 500 mM, Fig. 3) and agrees with a transport mode of simple diffusion through the lipid  
 322 phase of the membrane. The same pattern was found in duck RBC where  $P_{urea}$  was  $1.65 \times$   
 323  $10^{-6} \text{ cm s}^{-1}$  ( $T_{1/2}$  23.5 s, Fig. 2; Table 2;  $C_{urea} = 1\text{-}500 \text{ mM}$ , Fig. 3). The present study does  
 324 not reveal whether the twofold higher  $P_{urea}$  in duck RBC is due to a different lipid compo-  
 325 sition of the duck RBC membrane or an inter-individual variation as reported for chick  
 326 RBC (Brahm and Wieth, 1977). Albeit  $P_{urea}$  is twice that of chick RBC the conclusion  
 327 holds that urea is transported by simple diffusion in duck RBC. In accordance with the  
 328 simple diffusion mode,  $P_{urea}$  of chick and duck RBC is inhibited by neither PCMBS nor  
 329 PCMB that inhibit  $P_d$  and  $P_{urea}$  of human RBC, nor by phloretin that is a non-specific in-  
 330 hibitor of facilitated diffusion processes (Table 6; Brahm and Wieth, 1977; Brahm, 1982,  
 331 1983b). Further,  $E_A$  of  $P_{urea}$  is  $\sim 70 \text{ kJ mol}^{-1}$  that is typical for solute transport through the  
 332 lipid membrane phase (Table 3; Brahm and Wieth, 1977).  $E_A$  of UT-B-mediated  $P_{urea}$  is  
 333 lower:  $53 \text{ kJ mol}^{-1}$  in *Amphiuma* and  $12\text{-}35 \text{ kJ mol}^{-1}$  in human RBC (Table 3; Brahm,  
 334 1983b). However, it should be emphasised that  $E_A$  is not a sensitive discriminator to spec-  
 335 ify which transport mode prevails.

336 Urea transport in RBC of *Amphiuma*, dog, and human shows the characteristic pat-  
 337 tern of facilitated diffusion: A much higher transport than in lipid bilayer systems, satura-  
 338 tion kinetics, both competitive and noncompetitive, and reversible and irreversible inhibi-  
 339 tion, as well as temperature dependence different from that in bilayer systems.

340  $P_{urea}$  of human RBC is 2-3 orders of magnitude higher than in chick and duck RBC.  
 341 In the present study  $P_{urea}$  at 1 mM urea is  $2.60 \times 10^{-4} \text{ cm s}^{-1}$  ( $T_{1/2}$  116 ms, Fig. 2), close to  
 342  $2.67 \times 10^{-4} \text{ cm s}^{-1}$  in a previous study (Brahm, 1983b). The permeability is 4-5 times lower  
 343 than the value of  $1.16 \times 10^{-3} \text{ cm s}^{-1}$  reported by Mayrand and Levitt (1983) who deter-  
 344 mined  $P_{urea}$  from the slope of efflux curves with two points (Fig. 3 in Mayrand and Levitt,  
 345 1983). In the present study (Fig. 2) and Brahm (1983b)  $P_{urea}$  was determined from the  
 346 slope of efflux curves with generally six points (regression coefficient  $r^2 = 0.99$ ).

347  $P_{urea}$  decreases with increased urea concentration in accordance with saturation ki-  
 348 netics (Fig. 3; Eqn. 4) of the Michaelis-Menten type. Similar values of  $J_{urea}^{\max}$  and  $K_{1/2}$  were  
 349 determined in the present and previous studies (cf. Table 4).

350 In dog RBC  $P_{urea}$  at 1 mM is almost twice as high ( $4.67 \times 10^{-4} \text{ cm s}^{-1}$ ,  $T_{1/2}$  54 ms,  
 351 Fig. 2) as is the apparent affinity, expressed by  $K_{1/2}$ , compared to human RBC, while  $J_{urea}^{\max}$   
 352 is similar in the two species (Table 4).

353 Liu et al. (2011), using a stopped-flow light scattering methods, studied whether  
 354  $P_{urea}$  in RBC from selected mammals and birds is related to diet and urine concentrating  
 355 ability, and reported a  $P_{urea}$  at 10°C and  $C_{urea} = 250$  mM of dog and human RBC of respec-  
 356 tively  $5.3 \times 10^{-5}$  and  $1.1 \times 10^{-5}$  cm s<sup>-1</sup>. Extrapolated values to room temperature are one  
 357 order lower than in the present study.  $P_{urea}$  in dog RBC shows extremely low activation  
 358 energy of ~1 kJ mol<sup>-1</sup> and suggests that e.g. unstirred layers may contribute significantly to  
 359 the overall lower permeability.

360 Urea transport in *Amphiuma* RBC is also high and saturates (Fig. 3). The affinity to  
 361 urea in these cells is even higher than in dog RBC as  $K_{1/2}$  is 127 mM while  $J_{urea}^{max}$  is about 25  
 362 times lower than in dog and human RBC (Table 4). If  $J_{urea}^{max}$  is expressed per cell instead of  
 363 per unit area,  $J_{urea}^{max,cell}$  ( $\times 10^{10}$  mmol cell<sup>-1</sup> s<sup>-1</sup>) becomes similar: 1.6, 0.9, and 1.2 in respec-  
 364 tively *Amphiuma*, dog, and human RBC. In human RBC UT-B is ascribed to be the Kidd  
 365 antigen and the estimated number of transporters is between 14,000 and 32,000 (Masoure-  
 366 dis et al., 1980; Fröhlich et al., 1991; Manuzzu et al., 1993; Neau et al., 1993; Olivés et  
 367 al., 1995). Taking the 14,000 copies the turnover number in human RBC is  $\sim 5 \times 10^6$  urea  
 368 molecules site<sup>-1</sup> s<sup>-1</sup> at 25°C in agreement with previous estimates (Manuzzu et al., 1993;  
 369 Sands et al., 1997). It is an open question whether the similar  $J_{urea}^{max,cell}$  in the three species  
 370 is due to the same number of transport sites per cell with the same turnover rate per site or  
 371 different number of transport sites with different turnover rates per site. The turnover num-  
 372 ber indicates a channel-like mechanism (Manuzzu et al., 1993) but the term “facilitated  
 373 diffusion” conveniently reflects the effect and not the mechanism of UT-B.

374

375

### Diffusional water permeability

376  $P_d$  in human, dog, and duck RBC was inhibited with either PCMB or PCMBS by 50%,  
 377 67%, and 81%, respectively (Table 6). The maximal inhibition leaves a residual  $P_d$  in all  
 378 three RBC species of  $1.1$ - $1.3 \times 10^{-3}$  cm s<sup>-1</sup> that is as low as in chick RBC and artificial  
 379 lipid bilayer membranes, and the same as the residual  $P_f$  in human RBC after PCMB or  
 380 PCMBS treatment (Table 6; Cass and Finkelstein, 1967; Brahm and Wieth, 1977; Brahm,  
 381 1982; Finkelstein, 1987; Mathai et al., 2001, 2007). Most likely the two inhibitors close all  
 382 water transporting channels completely (Finkelstein, 1987). In human red blood cell ghosts  
 383 the complete inhibition increased  $E_A$  of  $P_d$  from 30 to 60 kJ mol<sup>-1</sup>, which is a typical value

384 of artificial membranes and liposomes.  $E_A$  is, however, too crude to be a discriminator of  
385 transport modes:  $E_A$  of  $P_d$  is ~42 kJ mol<sup>-1</sup> in chick RBC and 32 kJ mol<sup>-1</sup> in *Amphiuma*  
386 RBC with no AQP1, and is of the same order of magnitude as in duck and unmodified  
387 human RBC with AQP1 (Table 3; Brahm and Wieth, 1977; Brahm, 1982).

388

### 389 **Do urea and water share a pathway in common in red blood cells?**

390 Yang and Verkman (1998) suggested “That the UT3 protein is associated with an aqueous  
391 channel that transports water and urea in a coupled manner”. They further proposed that  
392 the UT-B was as efficient as AQP1 to transport water. Their conclusions were based upon  
393 expression studies in *Xenopus laevis* oocytes combined with volumetric measurements of  
394 water uptake at 10°C and [<sup>14</sup>C]urea uptake at 1 mM at 23°C.

395 Sidoux-Walter et al. (1999) questioned the conclusion by Yang and Verkman  
396 (1998). They showed that expression at high levels of the human RBC UT-B in  
397 *Xenopus laevis* oocytes induced not only high  $P_{urea}$  and  $P_f$  as reported by Yang and  
398 Verkman (1998), but also an increased permeability to small solutes, such as formamide  
399 through propionamide, and to diols, such as ethylene glycol and propylene glycol. Fur-  
400 ther, neither phloretin nor PCMB inhibited  $P_{urea}$  as they do in RBC that transport urea  
401 by facilitated diffusion. The data indicates that the transport specificity disappeared at  
402 high level expression. In contrast, expression at physiological levels increased expect-  
403 edly the phloretin-sensitive urea transport with no increase of  $P_f$  (Sidoux-Walter et al.,  
404 1999). The study by Lucien et al. (2002) also pointed out that expression of recombinant  
405 urea transporter (named hUT-B1) in *Xenopus* oocytes creates a  $P_{urea}$  that is efficiently  
406 inhibited by phloretin, but much less inhibited by PCMBs than the native  $P_{urea}$  in hu-  
407 man RBC. The authors further concluded that hUT-B1 is not a water channel.

408 Yang and Verkman (2002) extended their expression studies by means of double  
409 knockout mice whose RBC lack AQP1 and UT-B, and concluded that UT-B is an effi-  
410 cient water transporter. According to their study  $P_f$  distributes at 37°C with 6% related  
411 to UT-B, 79% to AQP1, and 15% to the lipid phase (the numbers are not in harmony  
412 with Fig. 5 of their study where the respective numbers are 8%, 90%, and 2%). The UT-  
413 B mediated fraction of  $P_f$  had an  $E_A$  of <2 kcal mol<sup>-1</sup> (8 kJ mol<sup>-1</sup>). This is about half the  
414 values of  $E_A$  of self-diffusion of water in water and previously reported values of total  $P_f$   
415 in RBC of which > 90% is ascribed to AQP1. Taking the 2 kcal mol<sup>-1</sup> and the other re-

416 ported  $E_A$  values by Yang and Verkman (2002) for  $P_f$  of AQP1 (7.3 kcal mol<sup>-1</sup>) and the  
417 lipid phase (19 kcal mol<sup>-1</sup>), the 6% of  $P_f$  related to UT-B at 37°C increases to >14% at  
418 10°C that is the experimental temperature of the study. The respective increase of  $P_f$  of  
419 AQP1 is from 79% to 84%, indicating that the lower the temperature the more  $P_f$  should  
420 be related to UT-B compared to AQP1.

421 The native and the modified mouse RBC were not tested for other functional  
422 properties than water and urea transport. Neither this study nor a later inhibition study  
423 from the same laboratory, using the same strategy (Levin et al., 2007) included the in-  
424 hibitors PCMB and PCMBS that have been widely used by others to inhibit RBC water  
425 and urea transport (Macey, 1984).

426 The present study uses a different approach and compares  $P_{urea}$  and  $P_d$  of the na-  
427 tive systems in intact RBC. The advantage is to avoid any major modification of cell  
428 membranes or expression in other cells that may modify the physiological pathway(s) or  
429 even give rise to artificial pathways. Earlier studies show that RBC from different spe-  
430 cies transport solutes differently (Jacobs, 1931; Jacobs et al., 1950), and a proper selec-  
431 tion of RBC species may reveal whether urea and water share a pathway in common in  
432 RBC. The selection of RBC species reflects that chicks and ducks as other birds excrete  
433 uric acid and that their RBC have no UT-B. Humans and dogs, and to a lesser extent  
434 *Amphiuma means*, concentrate and excrete urea as the end product of their protein me-  
435 tabolism, and their RBC have UT-B. Chick and *Amphiuma* RBC have no AQP1, and  
436 hence, the four combinations of high/low  $P_{urea}$  and  $P_d$  are available.

437 Water and a solute are said to share a common pathway if: 1) Water and the solute ex-  
438 perience the same structural environment as they cross the membrane, 2) they are able to  
439 interact or compete with one another to affect the permeability of one another, and 3) an  
440 inhibitor of water or solute permeating the pore also affects (inhibits or stimulates) the  
441 permeation of the other molecule in the pore (Brahm et al., 1993).

442 Whether water and urea share the AQP1 as suggested by some (Solomon, 1968;  
443 Solomon et al., 1983) and turned down by others (Macey, 1984; Galey and Brahm, 1985;  
444 Brahm and Galey, 1987; Finkelstein, 1987) or urea and water share UT-B (Yang and  
445 Verkman, 1998, 2002; Levin et al., 2007) makes no principal difference in the testing  
446 strategy of the hypothesis. Firstly, is  $P_{solute}$  above that of lipid bilayers that have no trans-  
447 porters inserted and if so does the transport saturate? Secondly, do the solutes interact?



448 Thirdly, is inhibition of both solutes present with the same inhibitor and with the same  
449 pattern? Fourthly, is the temperature dependence of solute transport through the proposed  
450 transporter different to that of diffusion through the lipid membrane phase?

451 Chick RBC show  $P_{urea}$  and both  $P_d$  and  $P_f$  as low as in lipid bilayer membranes (Ta-  
452 ble 2; Brahm and Wieth, 1977; Farmer and Macey, 1970). Urea shows no saturation kinet-  
453 ics (Fig. 3; Brahm and Wieth, 1977) and well-established inhibitors of water and urea  
454 transport in other RBC with UT-B and AQP1 (Table 6) inhibit neither  $P_{urea}$  nor  $P_d$ .  $E_A$  of  
455  $P_{urea}$  is high 71.2 kJ mol<sup>-1</sup> (Brahm and Wieth, 1977) and of the same magnitude as to other  
456 nonelectrolytes that permeate the lipid membrane phase (Wartiovaara, 1949; Macey et al.,  
457 1972; Galey et al., 1973; Brahm, 1983a).  $E_A$  of  $P_d$  is 41.9 kJ mol<sup>-1</sup> (Brahm and Wieth,  
458 1977).

459 The high anion self-exchange flux underlines that a proteinaceous pathway that cre-  
460 ates very high  $P_{anion}$  does not create a leak pathway to water and urea. The chick RBC re-  
461 sults are in line with the concept of a basic  $P_{urea}$ ,  $P_d$ , and  $P_f$  caused by simple diffusion  
462 through the lipid phase of the RBC membrane. Both  $E_A$  of  $P_{urea}$  and  $P_d$  and the lack of  
463 inhibition by means of phloretin, PCMB, and PCMBS support the concept.

464 The results of  $P_{Cl}$  and  $P_{urea}$  in duck RBC are in line with those of chick RBC. How-  
465 ever,  $P_d$  of duck RBC is the highest of the five RBC species and supports the concept that  
466 the cell membrane contains AQP1 that transports water and no solutes.

467 The studies of *Amphiuma* RBC show that high  $P_{Cl}$  is combined with high  $P_{urea}$  and  
468 low  $P_d$ . In comparison with human RBC  $P_{Cl}$  is very close in the two RBC species (Table  
469 2) while  $P_{urea}$  at 1 mM is about ten times lower in *Amphiuma* RBC. Our present knowl-  
470 edge of anion and urea transport in human RBC unquestionably calls for different path-  
471 ways of the two solutes. No evidence points to a different concept in *Amphiuma* RBC. The  
472 other important finding is that  $P_{urea}$  is markedly higher in *Amphiuma* RBC than in chick  
473 and duck RBC while  $P_d$  is even lower than in chick RBC. Hence, UT-B in *Amphiuma*  
474 RBC neither increases  $P_d$  nor creates a common pathway to urea and water.

475 From the studies of  $P_{Cl}$ ,  $P_{urea}$ , and  $P_d$  in intact human and dog RBC one might as-  
476 sume a coupling of water and urea transport because both cell types show higher values  
477 than in lipid bilayers. However, the ratio of  $P_d$  to  $P_{urea}$  differs considerably. The ratio is 6.7  
478 in dog RBC, in pig RBC the ratio is 8.2 (J. Brahm, unpublished data), and in human  
479 McLeod erythrocytes with Kell antigen-null the ratio is 7 (Brahm et al., 1993). The range



480 of  $P_{urea}$  from different donors varies over 100% (Brahm, 1983b), and taking the highest  
 481 and lowest values, the ratio shows a donor dependence between 9 and 4 (Table 5). These  
 482 results and the comparative study of 11 different mammals by Liu et al. (2011) that  
 483 showed a five-fold variation of  $P_{urea}$  and fairly similar  $P_f$  underline that the ratio is not  
 484 fixed and support the conclusion that the transport of water and urea is not coupled. Brahm  
 485 and Galey (1987) reached the same conclusion as they showed no solvent drag effect on  
 486 urea transport in human RBC while the efflux of tritiated water increased with the osmotic  
 487 flow of water and decreased against the osmotic flow of water.

488 The inhibition data (Table 6) neither supports a coupling of the two solutes. The  
 489 nonspecific inhibitor of facilitated transport systems phloretin efficiently inhibits both an-  
 490 ion and urea transport almost completely, but has no effect on  $P_d$ . According to the criteria  
 491 listed above this argues against the common pathway. PCMB and PCMBS are also non-  
 492 specific inhibitors. Both compounds inhibit  $P_{urea}$  and  $P_d$  to values close to those of lipid  
 493 bilayer systems and RBC of chick (basic  $P_{urea}$  and  $P_d$ ), duck (basic  $P_{urea}$ ), and *Amphiuma*  
 494 (basic  $P_d$ ). The tempting conclusion is that the two inhibitors close a common pathway.  
 495 However, the time dependence of the PCMB/PCMBS inhibitory effect is different. Inhibi-  
 496 tion of  $P_{urea}$  appears much faster than  $P_f$  (Macey, 1984) and inhibition of  $P_f$  and  $P_d$  has the  
 497 same time constant (W.R. Galey and J. Brahm, unpublished data).

498 The analogue compound thiourea inhibits urea transport. Thiourea is a competitive  
 499 inhibitor that is also transported by UT-B in human RBC. Thiourea is transported  $\sim 100 \times$   
 500 slower than urea (at 0°C; Wieth et al., 1974). The half saturation constant  $K_{1/2}^{thiourea}$  is 15-20  
 501 mM close to the half inhibition constant  $K_{I,urea}^{thiourea}$  of 12-14 mM of urea transport (Wieth et  
 502 al., 1974; Solomon and Chasan, 1980; Mayrand and Levitt, 1983; Brahm, 1983b) and the  
 503 half inhibition constant of urea on thiourea transport  $K_{I,thiourea}^{urea}$  is close to  $K_{1/2}^{urea}$  (J. Brahm,  
 504 unpublished data). The observation that  $K_{1/2}$  and  $K_I$  of each solute are equal accords with  
 505 the concept that urea and thiourea transport follows kinetics of simple Michaelis-Menten  
 506 type with the two solutes competing for binding to one and the same site. Neither thiourea  
 507 at 100 mM that inhibits  $P_{urea} > 95\%$  nor urea at 500 mM inhibits  $P_d$  (Brahm, 1982).

508 The overall conclusion of the present comparative study is that there is substantial  
 509 evidence that urea and water do not share UT-B, and that transport of the two solutes is not  
 510 coupled in intact RBC.

511

**ACKNOWLEDGEMENT**

512 Dr. Anne K. Busk is gratefully acknowledged for helpful advisement and discussions.

513

514

## REFERENCES

- 515 **Borgnia, M., Nielsen, S., Engel, A. and Agre, P.** (1999). Cellular and molecular biol-  
516 ogy of the aquaporin water channels. *Ann. Rev. Biochem.* **68**, 425-58.
- 517 **Brahm, J.** (1977). Temperature-dependent changes of chloride transport kinetics in hu-  
518 man red cells. *J. Gen. Physiol.* **70**, 283-306.
- 519 **Brahm, J.** (1982). Diffusional water permeability of human erythrocytes and their ghosts.  
520 *J. Gen. Physiol.* **79**, 791-819.
- 521 **Brahm, J.** (1983a). Permeability of human red cells to a homologous series of aliphatic  
522 alcohols. *J. Gen. Physiol.* **81**, 283-304.
- 523 **Brahm, J.** (1983b). Urea permeability of human red cells. *J. Gen. Physiol.* **82**, 1-23.
- 524 **Brahm, J.** (1983c). Kinetics of glucose transport in human erythrocytes. *J. Physiol.* **339**,  
525 339-354.
- 526 **Brahm, J.** (1989). Transport measurement of anions nonelectrolytes and water in red  
527 blood cell and ghost systems. In *Methods in Enzymology* (ed. B. Fleischer and S.  
528 Fleischer), pp. **173**, 160-175. New York: Academic Press.
- 529 **Brahm, J. and Wieth, J. O.** (1977). Separate pathways for urea and water and for chlo-  
530 ride in chicken erythrocytes. *J. Physiol.* **66**, 727-749.
- 531 **Brahm, J. and Galey, W. R.** (1987). Diffusional solute flux during osmotic water flow  
532 across the human red cell membrane. *J. Gen. Physiol.* **89**, 703-716.
- 533 **Brahm, J., Galey, W. R. and Levinson, C.** (1993). Water and solute permeation of po-  
534 rous membranes. In *Water Transport in Leaky Epithelia. Alfred Benzon Sympo-*  
535 *sium 34* (ed. H. H. Ussing, E. H. Larsen and N. Willumsen), pp. **34**, 504-512. Co-  
536 penhagen: Munksgaard.
- 537 **Brown, P. A., Feinstein, M. B. and Sha'afi, R. I.** (1975). Membrane proteins related to  
538 water transport in human erythrocytes. *Nature (London)*. **254**, 523-525.
- 539 **Cala, P. M.** (1980). Volume regulation by *Amphiuma* red blood cells. The membrane  
540 potential and its implications regarding the nature of ion-flux pathways. *J. Gen.*  
541 *Physiol.* **76**, 683-708.
- 542 **Cass, A. and Finkelstein, A.** (1967). Water permeability of thin lipid membranes. *J.*  
543 *Gen. Physiol.* **50**, 1765-1784.
- 544 **Collander, R. and Bärlund, H.** (1933). Permeabilitätsstudien an Chara Ceratophylla.  
545 *Acta Botan. Fennici.* **11**, 1-114.

- 546 **Dalmark, M. and Wieth, J. O.** (1972). Temperature dependence of chloride bromide  
547 iodide thiocyanate and salicylate transport in human red cells. *J. Physiol.* **244**,  
548 583-610.
- 549 **Farmer, R. E. L. and Macey, R. I.** (1970). Perturbation of red cell volume: rectification of  
550 osmotic flow. *Biochim. Biophys. Acta.* **196**, 53-65.
- 551 **Finkelstein, A.** (1987). The red cell membrane. In *Water movement through lipid bilayers*  
552 *pores and plasma membranes. Theory and reality*, pp. 166-184. New York: John  
553 Wiley and Sons Inc.
- 554 **Fröhlich, O. and Gunn, R. B.** (1987). Interactions of inhibitors on anion transporter of  
555 human erythrocyte. *Amer. J. Physiol. Cell Physiol.* **252**, C153-C162.
- 556 **Fröhlich O., Macey R. I., Edwards-Moulds J., Gargus J. J. and Gunn R. B.** (1991).  
557 Urea transport deficiency in Jk(a-b-) erythrocytes. *Amer. J. Physiol. Cell Physiol.*  
558 **60**, C778-C783.
- 559 **Galey, W. R., Owen, J. D. and Solomon, A. K.** (1973). Temperature dependence of  
560 nonelectrolyte permeation across red cell membranes. *J. Gen. Physiol.* **61**, 727-  
561 746.
- 562 **Galey, W. R. and Brahm, J.** (1985). The failure of hydrodynamic analysis to define pore  
563 size in cell membranes. *Biochim. Biophys. Acta.* **818**, 425-428.
- 564 **Galucci, E., Micelli, S. and Lippe, C.** (1971). Non-electrolyte permeability across lipid  
565 bilayer membranes. In *Role of Membranes in Secretory Processes* (ed. L. Bolis, R.  
566 D. Keynes and W. Wilbrandt), pp. 397-400. Amsterdam; North-Holland.
- 567 **Gasbjerg, P. K. and Brahm, J.** (1991). Glucose transport kinetics in human red blood  
568 cells. *Biochim. Biophys. Acta.* **1062**, 83-93.
- 569 **Gasbjerg, P. K., Funder, J. and Brahm, J.** (1993). Kinetics of Residual Chloride  
570 Transport in Human Red Blood Cells after Maximum Covalent 44'-  
571 Diisothiocyanostilbene-22'-Disulfonic Acid Binding. *J. Gen. Physiol.* **101**, 715-  
572 732.
- 573 **Gasbjerg, P. K., Knauf, P. A. and Brahm, J.** (1996). Kinetics of bicarbonate transport  
574 in human red blood cell membranes at body temperature. *J. Gen. Physiol.* **108**,  
575 565-576.
- 576 **Gulliver, G.** (1875). Observations on the sizes and shapes of the red cell corpuscles of  
577 blood of vertebrates with drawings of them to a uniform scale and extended and

- 578 revised tables of measurements. *Proc. Sci. Meetings Zoological Soc. Lond.* 474-  
579 496.
- 580 **Jacobs, M. H.** (1931). Osmotic hemolysis and zoological classification. *Proc. Amer.*  
581 *Phil. Soc.* **70**, 363-370.
- 582 **Jacobs, M. H., Glassman, H. N. and Parpart, A. K.** (1950). Hemolysis and zoological  
583 relationship comparative studies with four penetrating non-electrolytes. *J. Exper.*  
584 *Zool.* **113**, 277-300.
- 585 **Jennings, M. L.** (1992a). Cellular anion transport. In *The Kidney: Physiology and*  
586 *Pathophysiology* (ed. D. W. Seldin and G. Giebisch), pp. 113-145. New York:  
587 Raven Press.
- 588 **Jennings, M. L.** (1992b). Anion transport proteins. In *The Kidney: Physiology and*  
589 *Pathophysiology* (ed. D. W. Seldin and G. Giebisch), pp. 503-535. New York:  
590 Raven Press.
- 591 **Jensen, F. B. and Brahm, J.** (1995). Kinetics of chloride transport across fish red  
592 blood cell membranes. *J. Exp. Biol.* **198**, 2237-2244.
- 593 **Jensen, F. B., Wang, T., Jones, D. R. and Brahm, J.** (1998). Carbon dioxide transport  
594 in alligator blood and its erythrocyte permeability to anions and water. *Amer. J.*  
595 *Physiol. Regul. Integr. Comp. Physiol.* **274**, R661-R671.
- 596 **Jensen, F. B., Wang, T. and Brahm, J.** (2001). Acute and chronic influence of tem-  
597 perature on red blood cell anion exchange. *J. Exp. Biol.* **204**, 39-45.
- 598 **Jensen, F. B., Brahm, J., Koldkjær, P., Wang, T., McKenzie, D. J. and Taylor, W.**  
599 (2003). Anion exchange in the giant erythrocytes of African lungfish. *J. Fish Biol.*  
600 **62**, 1044-1052.
- 601 **Knauf, P. A.** (1989). Kinetics of anion transport. In *The Red Cell Membrane*, ed. Raess  
602 BU and Tunncliff G, pp. 171-200. Humana Press, Clifton.
- 603 **Knauf, P. A. and Brahm, J.** (1989). Functional asymmetry of the anion-exchange pro-  
604 tein capnophorin: effects on substrate and inhibitor binding. In *Methods in Enzy-*  
605 *mology*, ed. Fleischer B and Fleischer S, **173**, 432-453. Academic Press, New  
606 York.
- 607 **Knauf, P. A., Gasbjerg, P. K. and Brahm, J.** (1996). The asymmetry of chloride  
608 transport at 38°C in human red blood cell membranes. *J. Gen. Physiol.* **108**, 577-  
609 589.

- 610 **Knauf, P. A., Law, F., Leung, T. V., Gehret, A. U. and Perez, M.L.** (2002). Sub-  
611 strate-dependent reversal of anion transport site orientation in the human red  
612 blood cell anion-exchange protein AE1. *Proc. Natl. Acad. Sci.* **99**, 10861-10864.
- 613 **Levin, M. H., de la Fuente, R. and Verkman, A. S.** (2007). Urearetics: a small mole-  
614 cule screen yields nanomolar potency inhibitors of urea transporter UT-B. *FASEB*  
615 *J.* **21**, 551-563.
- 616 **Litman, T., Søgaard, R. and Zeuthen, T.** (2009). Ammonia and urea permeability of  
617 mammalian aquaporins. In *Handbook of Experimental Pharmacology* (ed. E.  
618 Beitz), pp. **190**, 327-58. Berlin: Springer-Verlag.
- 619 **Liu, L., Lei, T., Bankir, L., Zhao, D., Gai, X., Zhao, X. and Yang, B.** (2011). Eryth-  
620 rocyte permeability to water and urea: comparative study in rodents, ruminants,  
621 carnivores, humans, and birds. *J. Comp. Physiol. B* **181**, 65-72.
- 622 **Lucien, N., Sidoux-Walter, F., Roudier, N., Ripoche, P., Huet, M., Trinh-Trang-**  
623 **Tan, M-M., Cartron, J-P. and Bailly, P.** (2002). Membrane transport structure  
624 function and biogenesis: Antigenic and functional properties of the human red  
625 blood cell urea transporter hUT-B1. *J. Biol. Chem.* **277**, 34101-34108.
- 626 **Lytle, C., McManus, T. J. and Haas, M.** (1998). A model of Na-K-2Cl cotransport  
627 based on ordered ion binding and glide symmetry. *Amer. J. Physiol. Cell Physiol.*  
628 **274**, C299-C309.
- 629 **Lytle, C. and McManus, T.** (2002). Coordinate modulation of Na-K-2Cl cotransport  
630 and K-Cl cotransport by cell volume and chloride. *Amer. J. Physiol. Cell Physiol.*  
631 **283**, C1422-C1431.
- 632 **Macey, R. I.** (1984). Transport of water and urea in red blood cells. *Amer. J. Physiol.*  
633 *Cell Physiol.* **246**, C195-C203.
- 634 **Macey, R. I. and Farmer, R. E. L.** (1970). Inhibition of water and solute permeability in  
635 human red cells. *Biochim. Biophys. Acta.* **211**, 104-106.
- 636 **Macey, R. I., Karan, D. M. and Farmer, R. E. L.** (1972). Properties of water channels  
637 in human red cells. *Biomembranes* **3**, 331-40.
- 638 **Manuzzu, L. M., Moronne, M. M. and Macey, R. I.** (1993). Estimate of the number of  
639 urea transport sites in erythrocyte ghosts using a hydrophobic mercurial. *J. Membr.*  
640 *Biol.* **133**, 85-97.

- 641 **Masouredis, S. P., Sudora, E., Mahan, L. and Victoria, E. J.** (1980). Quantitative  
642 immunoferritin microscopy of Fya, Fyb, Jka, U, and Dib antigen site numbers on  
643 human red cells. *Blood*. **56**, 969-977.
- 644 **Mathai, J. C., Sprott, G. D. and Zeidel, M. L.** (2001). Molecular mechanisms of wa-  
645 ter and solute transport across archaeobacterial lipid membranes. *J. Biol. Chem.*  
646 **276**, 27266-27271.
- 647 **Mathai, J. C., Tristram-Nagle, S., Nagle, J. F. and Zeidel, M. L.** (2007). Structural  
648 Determinants of Water Permeability through the Lipid Membrane. *J. Gen.*  
649 *Physiol.* **131**, 69-76.
- 650 **Mayrand, R. R. and Levitt, D. G.** (1983). Urea and ethylene glycol-facilitated trans-  
651 port systems in the human red cell membrane. *J. Gen. Physiol.* **81**, 211-237.
- 652 **Neau, P., Degeilh, F., Lamotte, H., Rousseau, B. and Ripoche, P.** (1993). Photoaffin-  
653 ity labeling of the human red-blood-cell urea-transporter polypeptide components.  
654 Possible homology with the Kidd blood group antigen. *Eur. J. Biochem.* **218**, 447-  
655 55.
- 656 **Nikinmaa, M.** (1990). Vertebrate Red Blood Cells. In *Zoophysiology* (ed. S. D. Brad-  
657 shaw, W. Burggren, H. C. Heller, S. Ishii, H. Langer, G. Neuweiler and D. J. Ran-  
658 dall), pp. **28**, 104-106. Berlin: Springer-Verlag.
- 659 **Oliva, R., Calamita, G., Thornton, J. M. and Pellegrini-Calace, M.** (2010). Electro-  
660 statics of aquaporin and aquaglyceroporin channels correlates with their transport  
661 selectivity. *Proc. Natl. Acad. Sci.* **107**, 4135-4140.
- 662 **Olivès, B., Mattei, M-G., Huet, M., Neau, P., Martial, S., Cartron, J-P. and Bailly,**  
663 **P.** (1995). Kidd blood group and urea transport function of human erythrocytes  
664 are carried by the same protein. *J. Biol. Chem.* **270**, 15607-15610.
- 665 **Paganelli, C. V. and Solomon, A. K.** (1957). The rate of exchange of tritiated water  
666 across the human red cell membrane. *J. Gen. Physiol.* **41**, 259-277.
- 667 **Poznansky, M., Tong, S., White, P. C., Milgram, J. M. and Solomon, A. K.** (1976).  
668 Nonelectrolyte diffusion across lipid bilayer systems. *J. Gen. Physiol.* **67**, 45-66.
- 669 **Sands, J. M., Timmer, R. T. and Gunn, R. B.** (1997). Urea transporters in kidney and  
670 erythrocytes. *Amer. J. Physiol. Ren. Physiol.* **273**, F321 - F339.
- 671 **Sidel, V. W. and Solomon, A. K.** (1957). Entrance of water into human red cells under  
672 an osmotic pressure gradient. *J. Gen. Physiol.* **41**, 243-257.



- 673 **Sidoux-Walter, F., Lucien, N., Olivès, B., Gobin, R., Rousselet, G., Kamsteeg, E.-J.,**  
674 **Ripoche, P., Deen, P. M. T., Cartron, J.-P. and Bailly, P.** (1999). At physiologi-  
675 cal expression levels the Kidd blood group/urea transporter protein is not a water  
676 channel. *J. Biol. Chem.* **274**, 30228-30235.
- 677 **Siebens, A. W. and Kregenow, F. M.** (1985). Volume-regulatory responses of *Am-*  
678 *phiuma* red cells in anisotonic media. The effect of amiloride. *J. Gen. Physiol.* **86**,  
679 527-564.
- 680 **Soegaard, L. B., Hansen, M. N., van Elk, C., Brahm, J. and Jensen, F. B.** (2012).  
681 Respiratory properties of blood in the harbor porpoise, *Phocoena phocoena*. *J.*  
682 *Exp. Biol.* **215**, 1938-1943.
- 683 **Solomon, A. K.** (1968). Characterization of biological membranes by equivalent pores.  
684 *J. Gen. Physiol.* **51**, 335s-364s.
- 685 **Solomon, A. K. and Chasan, B.** (1980). Thiourea inhibition of urea permeation into  
686 human red cells. *Fed. Proc.* **39**, 957.
- 687 **Solomon, A. K., Chasan, B., Dix, J. A., Lukacovic, M. F., Toon, M. R. and Verkman,**  
688 **A. S.** (1983). The aqueous pore in the red cell membrane: band 3 as a channel for  
689 anions cations nonelectrolytes and water. *Ann. N. Y. Acad. Sci.* **414**, 97-124.
- 690 **Toyoshima, Y. and Thompson, T. E.** (1975). Chloride flux in bilayer membranes:  
691 Chloride permeability in aqueous dispersions of single-walled bilayer vesicles.  
692 *Biochemistry.* **14**, 1525-1531.
- 693 **Verkman, A. S. and Mitra, A. K.** (2000). Structure and function of aquaporin water  
694 channels. *Amer. J. Physiol. Ren. Physiol.* **278**, F13-F28.
- 695 **Vreeman, H. J.** (1966). Permeability of thin phospholipid films. *Proc. Kon. Nederl.*  
696 *Akad. Wet.* **69**, 564-577.
- 697 **Wartiovaara, V.** (1949). The permeability of the plasma membranes of *Nitella* to nor-  
698 mal primary alcohols at low and intermediate temperatures. *Physiol. Plant.* **2**, 184-  
699 196.
- 700 **Wieth, J. O., Funder, J., Gunn, R. B. and Brahm, J.** (1974). Passive transport path-  
701 ways for chloride and urea through the red cell membrane. In *Comparative Bio-*  
702 *chemistry and Physiology of Transport* (ed. L. Bolis, K. Bloch, S. E. Luria and L.  
703 Lynen), pp. 317-337. Amsterdam: North-Holland Publishing Company.



- 704 **Wieth, J. O. and Brahm, J.** (1977). Separate pathways to water and urea in red blood  
705 cells? A comparative physiological approach. *XXVIIth Int. Congr. Physiol. Sci.*  
706 Abstract 1.06.27
- 707 **Wu, B. and Beitz, E.** (2007). Aquaporins with selectivity for unconventional per-  
708 meants. *Cell. Mol. Life Sci.* **64**, 2413-2421.
- 709 **Yang, B. and Verkman, A. S.** (1998). Urea transporter UT3 functions as an efficient  
710 water channel. Direct evidence for a common water/urea pathway. *J. Biol. Chem.*  
711 **273**, 9369-9372.
- 712 **Yang, B. and Verkman, A. S.** (2002). Analysis of Double Knockout Mice Lacking  
713 Aquaporin-1 and Urea Transporter UT-B. Evidence for UT-B-facilitated water  
714 transport in erythrocytes. *J. Biol. Chem.* **277**, 36782-36786.
- 715 **Zeuthen, T.** (2010). Water-transporting proteins. *J. Membr. Biol.* **234**, 57-73.

716

**FIGURE LEGENDS**

717 Fig. 1. A semilogarithmic plot of representative examples of <sup>36</sup>Cl efflux under self-  
718 exchange conditions at pH 7.2-7.5 and 25°C in RBC of chick, duck, *Amphiuma*, dog,  
719 and human. The logarithmic ordinate expresses the fraction of tracer that remains in the  
720 cells at a given time (abscissa). The efflux rate equals the numerical value of the slope  
721 of the curve. The chloride concentration was 127 mM in *Amphiuma* RBC experiments  
722 and 150 mM in the other RBC experiments. The efflux rate in dog RBC (dashed line)  
723 was estimated by interpolation of data obtained at 38°C and 0°C, and an  $E_A$  of 89.6 kJ  
724 mol<sup>-1</sup> (cf. Table 3).

725

726 Fig. 2. A semilogarithmic depiction (see details in legend to Fig. 1) of representative  
727 examples of [<sup>14</sup>C]urea efflux under self-exchange conditions in RBC from chick, duck,  
728 *Amphiuma*, dog, and human at 25°C and pH 7.2-7.5. The experiments were performed  
729 at 1 mM urea.

730

731 Fig. 3. Concentration dependence of  $P_{urea}$  under self-exchange conditions in RBC from  
732 five species at 25°C and pH 7.2-7.5. The decline of  $P_{urea}$  with increasing urea concentra-  
733 tion in RBC of dog, human, and *Amphiuma* reflects saturation kinetics of urea trans-  
734 port. Each point on the curves is an average of 2-5 efflux experiments as those shown in  
735 Fig. 2. Standard deviations are shown in experiments where they exceed the size of the  
736 symbols (dog).

737

738 Fig. 4. A semilogarithmic plot (see details in legend to Fig. 1) of representative exam-  
739 ples of diffusional efflux of <sup>3</sup>H<sub>2</sub>O under self-exchange conditions in RBC from chick,  
740 duck, *Amphiuma*, dog, and human at 25°C and pH 7.2-7.5.

741

1

**TABLES**

2

3 Table 1. RBC volume ( $V$ ), water volume ( $V_w$ ), and area ( $A$ ) of chick, duck, *Amphiuma*,  
4 dog, and human at physiological conditions

|                                                                                                  | Chick <sup>a</sup> | Duck | <i>Amphiuma</i> <sup>b</sup> | Dog <sup>c</sup> | Human <sup>c</sup> |
|--------------------------------------------------------------------------------------------------|--------------------|------|------------------------------|------------------|--------------------|
| $V \times 10^{12} \text{ cm}^3$                                                                  | 128                | 175  | 6500                         | 67               | 87                 |
| $\frac{V_w}{V} \text{ (%)}$                                                                      | 68                 | 68   | 68                           | 68               | 70                 |
| $A \times 10^8 \text{ cm}^2$                                                                     | 175                | 190  | 5000                         | 117              | 142                |
| $\frac{V_w}{A} \times 10^5 \text{ cm}$                                                           | 5.0                | 6.3  | 8.9                          | 3.9              | 4.3                |
| <sup>a</sup> Brahm and Wieth (1977); <sup>b</sup> Cala (1980), <sup>c</sup> Wieth et al. (1974). |                    |      |                              |                  |                    |

5

- 1 Table 2. Chloride, urea and diffusional water permeability of RBC from chick, duck,  
 2 *Amphiuma*, dog, and human at 25°C and pH 7.2-7.4.

|                 | $P_{Cl}$<br>cm s <sup>-1</sup> × 10 <sup>4</sup> | $P_{urea}$<br>cm s <sup>-1</sup> × 10 <sup>6</sup> | $P_d$<br>cm s <sup>-1</sup> × 10 <sup>3</sup> |
|-----------------|--------------------------------------------------|----------------------------------------------------|-----------------------------------------------|
| Chick           | 0.94 (0.03, n=2)                                 | 0.84 (0.02, n=3)                                   | 0.84 (0.19, n=5)                              |
| Duck            | 2.15 (0.06, n=2)                                 | 1.65 (0.33, n=6)                                   | 5.95 (1.17, n=11)*                            |
| <i>Amphiuma</i> | 1.64 (0.06, n=2)                                 | 29.5 (2.9, n=4)*                                   | 0.39 (0.09, n=2)                              |
| Dog             | 1 <sup>a</sup>                                   | 467 (37, n=3)*                                     | 3.13 (0.57, n=10)*                            |
| Human           | 1.42 (0.18, n=6)                                 | 260 (7, n=4)*                                      | 2.35 (0.09, n=4)*                             |

The numbers are Mean (SD).  $P_{urea}$  was determined at 1 mM urea. <sup>a</sup>Calculated by interpolation of  $P_{Cl}$  values obtained at 0 and 38°C, and an  $E_A$  of 89.6 kJ mol<sup>-1</sup>.  $P_{urea}$  and  $P_d$  values, respectively, were compared by means of one way ANOVA with multiple comparisons versus chick RBC as control group. \*Indicates that the value is significantly different (p<0.05)

3  
4

1 Table 3. Apparent activation energy of chloride and urea self-exchange and diffusive  
 2 water transport in RBC from five species

|                         | Chick                       | Duck                 | <i>Amphiuma</i>      | Dog                 | Human                   |
|-------------------------|-----------------------------|----------------------|----------------------|---------------------|-------------------------|
| $E_A$                   |                             |                      |                      |                     |                         |
| (kJ mol <sup>-1</sup> ) |                             |                      |                      |                     |                         |
| Tp. (°C)                | 0-40                        | 4-40                 | 0-25                 | 0-38                | 0-38                    |
| Chloride                | 96.4-<br>138.5 <sup>a</sup> | 117.8 (3.9,<br>n=14) | 74.9 (3.8,<br>n=8)*  | 89.6 (0.7,<br>n=12) | 83.8-125.7 <sup>b</sup> |
| Urea                    | 71.2 <sup>a</sup>           | 69.6 (2.6,<br>n=20)  | 53.3 (4.3,<br>n=15)* | Not det.            | 12 <sup>c</sup>         |
| Water                   | 41.9 <sup>a</sup>           | 34.9 (4.2,<br>n=26)  | 32.1 (6.2, n=6)      | Not det.            | 21 <sup>d</sup>         |

<sup>a</sup>Brahm and Wieth (1977), <sup>b</sup>Brahm (1977), <sup>c</sup>Brahm (1983b), <sup>d</sup>Brahm (1982) . The numbers are Mean (SD). \*Significantly different from chick (Student's t-test, p<0.05)

3

- 1 Table 4. Half saturation constant ( $K_{1/2}$ ) and maximum urea transport ( $J_{urea}^{max}$ ) in RBC of  
2 *Amphiuma means*, dog, and human at 25°C and pH 7.2-7.5

|                            | $K_{1/2}$<br>mM | $J_{urea}^{max}$<br>mmol cm <sup>-2</sup> s <sup>-1</sup> × 10 <sup>6</sup> |
|----------------------------|-----------------|-----------------------------------------------------------------------------|
| <i>Amphiuma means</i>      | 127             | 3.5                                                                         |
| Dog                        | 173             | 75                                                                          |
| Human                      | 345             | 83                                                                          |
| Human <sup>a</sup>         | 334             | 82                                                                          |
| <sup>a</sup> Brahm (1983b) |                 |                                                                             |

3

- 1 Table 5. Urea and diffusional water permeability of RBC from three human donors at  
 2 25°C and pH 7.2.

|       | $P_{urea}$<br>cm s <sup>-1</sup> × 10 <sup>4</sup> | $P_d$<br>cm s <sup>-1</sup> × 10 <sup>3</sup> | $P_d P_{urea}^{-1}$ |
|-------|----------------------------------------------------|-----------------------------------------------|---------------------|
| J. B. | 2.60 (0.07, n=4)                                   | 2.35 (0.09, n=4)                              | 9.0                 |
| J. B. | 2.67 (0.05, n=4) <sup>a</sup>                      | 2.4 (0.2, n=18) <sup>a</sup>                  | 8.9                 |
| J. S. | 5.88 (0.26, n=4) <sup>a*</sup>                     | 2.45 (0.16, n=6)                              | 4.2                 |

<sup>a</sup>Brahm (1983b).  $C_{urea}$  was 1 mM. The numbers are Mean (SD). \*Significantly different from J.B. (Student's t-test, p<0.01)

- 3  
 4  
 5

1 Table 6. Inhibition (%) of solute transport in RBC from five species

|          |            | Chick            | Duck             | <i>Amphiuma</i>  | Dog              | Human            |
|----------|------------|------------------|------------------|------------------|------------------|------------------|
| Chloride | DIDS       | >99 <sup>a</sup> | 99 <sup>b</sup>  | >99 <sup>d</sup> | >99 <sup>e</sup> | >99 <sup>h</sup> |
|          | DNDS       |                  |                  |                  | >99 <sup>f</sup> | >99 <sup>h</sup> |
|          | Phloretin  | >99 <sup>a</sup> | >99 <sup>b</sup> | >99 <sup>d</sup> |                  | >99 <sup>h</sup> |
| Urea     | PCMBS/PCMB |                  | 0 <sup>b</sup>   |                  | >95 <sup>c</sup> | >90 <sup>i</sup> |
|          | Phloretin  | 0 <sup>a</sup>   | 0 <sup>b</sup>   | >99 <sup>c</sup> |                  | >99 <sup>i</sup> |
| Water    | DIDS/DNDS  |                  |                  |                  |                  | 0 <sup>j</sup>   |
|          | PCMBS/PCMB | 0 <sup>a</sup>   | ~81 <sup>c</sup> |                  | ~67 <sup>g</sup> | ~50 <sup>j</sup> |
|          | Phloretin  | 0 <sup>a</sup>   |                  |                  |                  | 0 <sup>j</sup>   |

<sup>a</sup>Brahm and Wieth (1977). Experimental temperature was <sup>b</sup>0°C, <sup>c</sup>25°C, <sup>d</sup>10°C, and <sup>e</sup>37°C. <sup>f</sup>Estimated from a determination of the half inhibition constant  $K_I$  of 7  $\mu$ M in the concentration range 0-50  $\mu$ M. The value is close to a  $K_I = 6 \mu$ M as determined in human RBC by Gasbjerg et al. (1993). <sup>g</sup>Brahm et al. (1993). <sup>h</sup>Gasbjerg et al. (1993). <sup>i</sup>Brahm (1983b). <sup>j</sup>Brahm (1982). All experiments were carried out at pH 7.2-7.5.

2



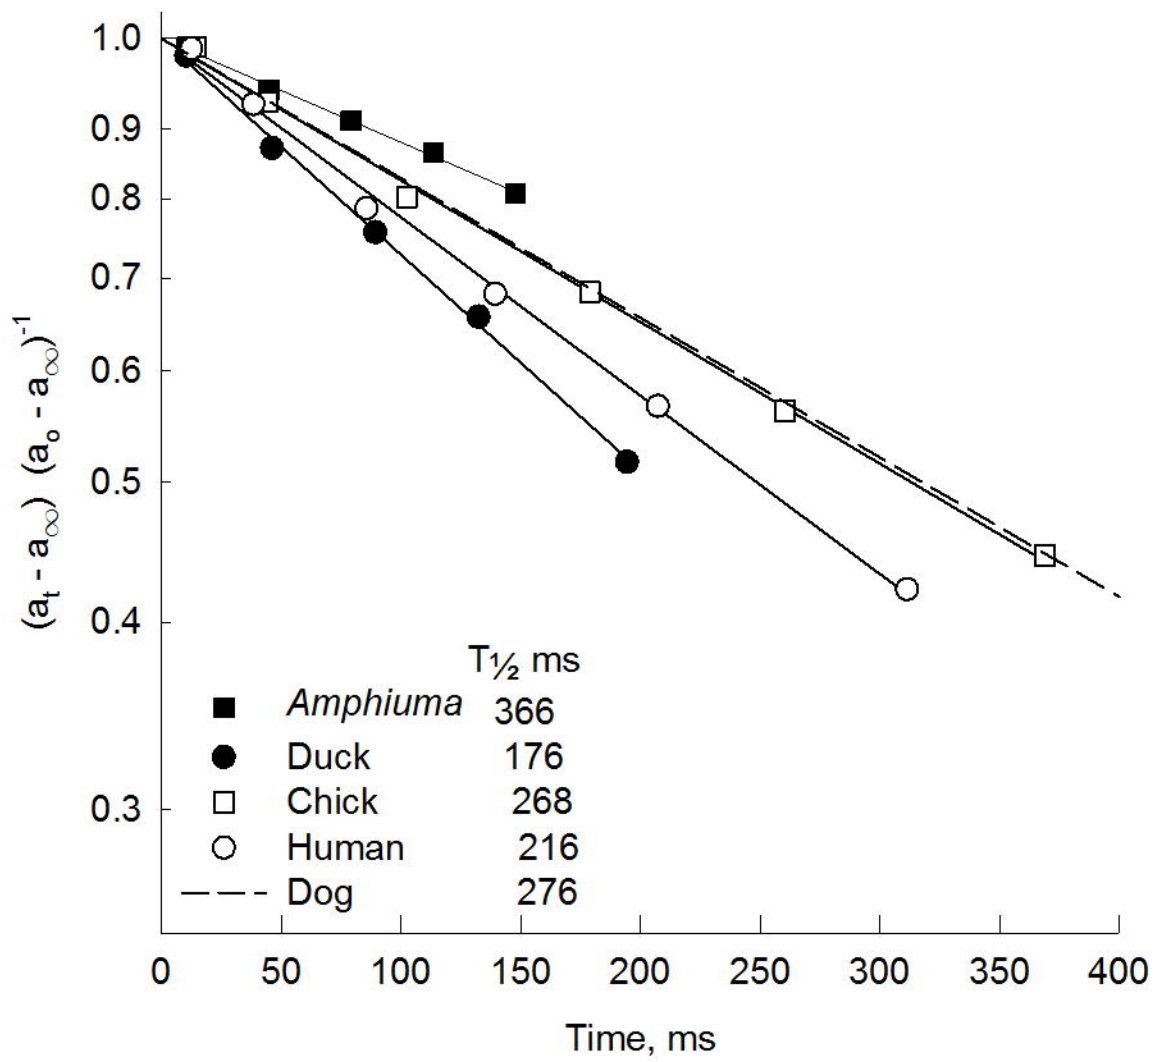

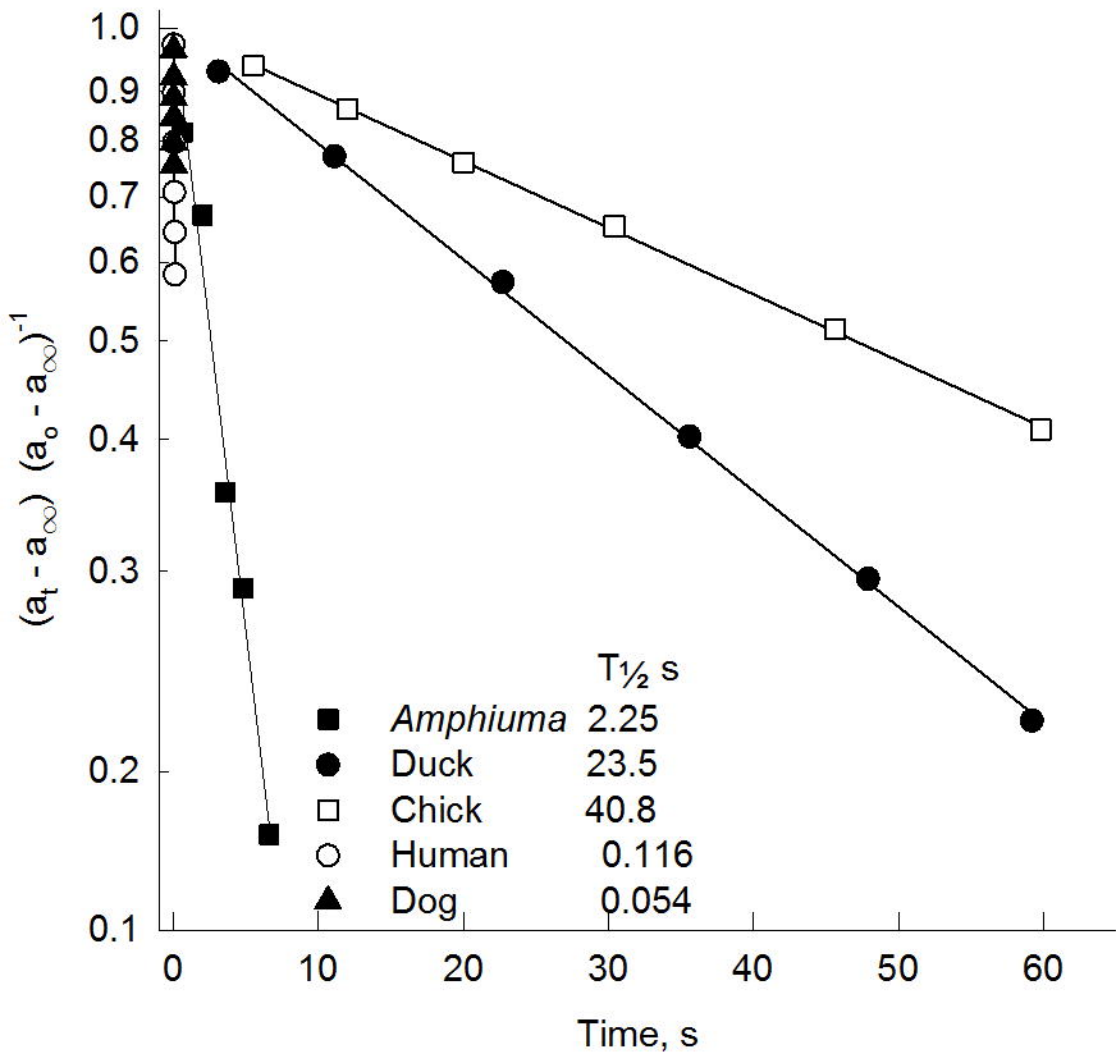

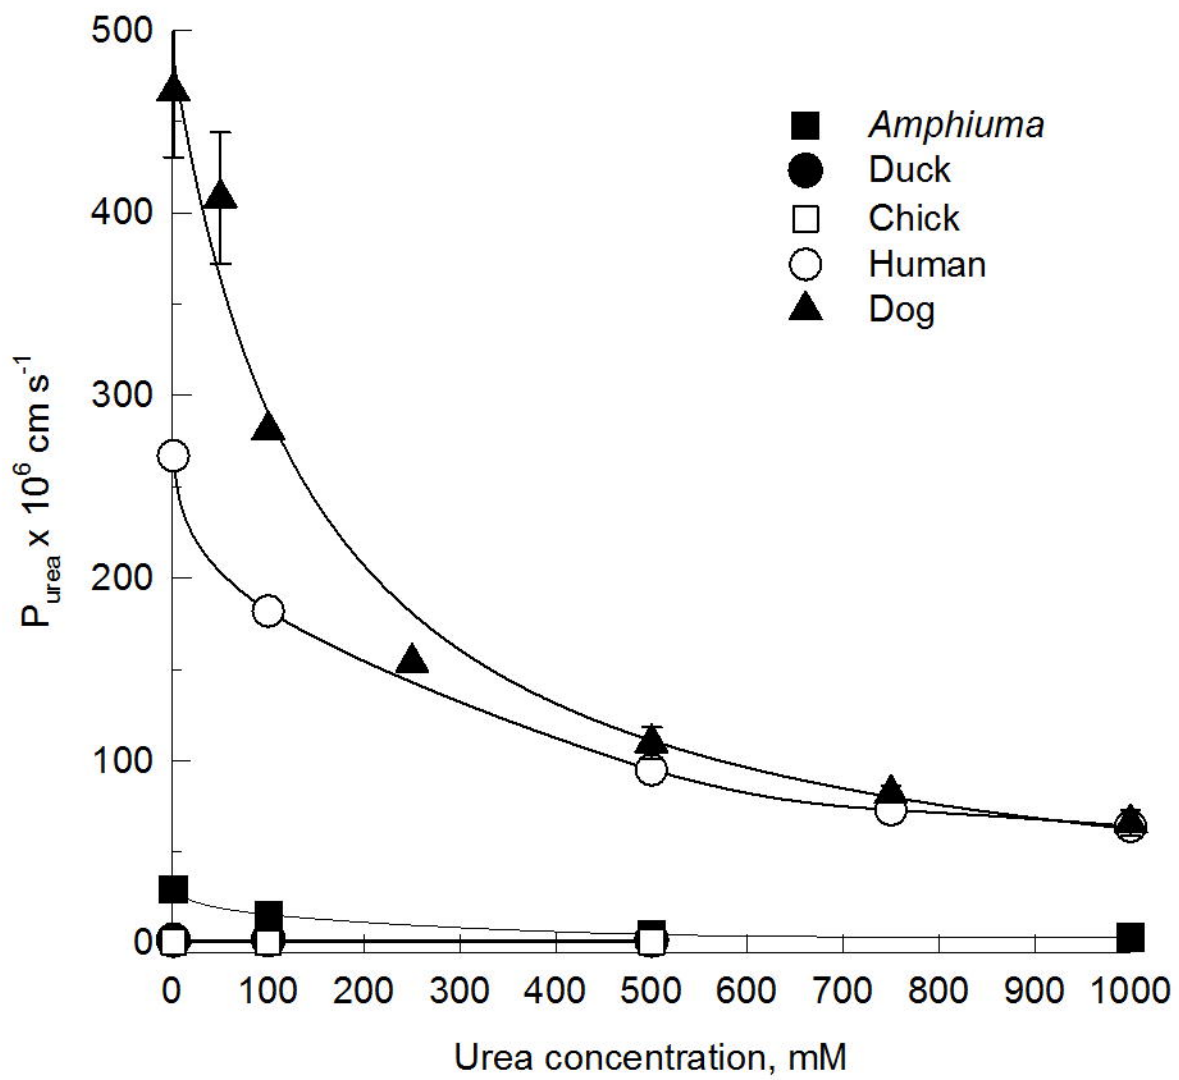

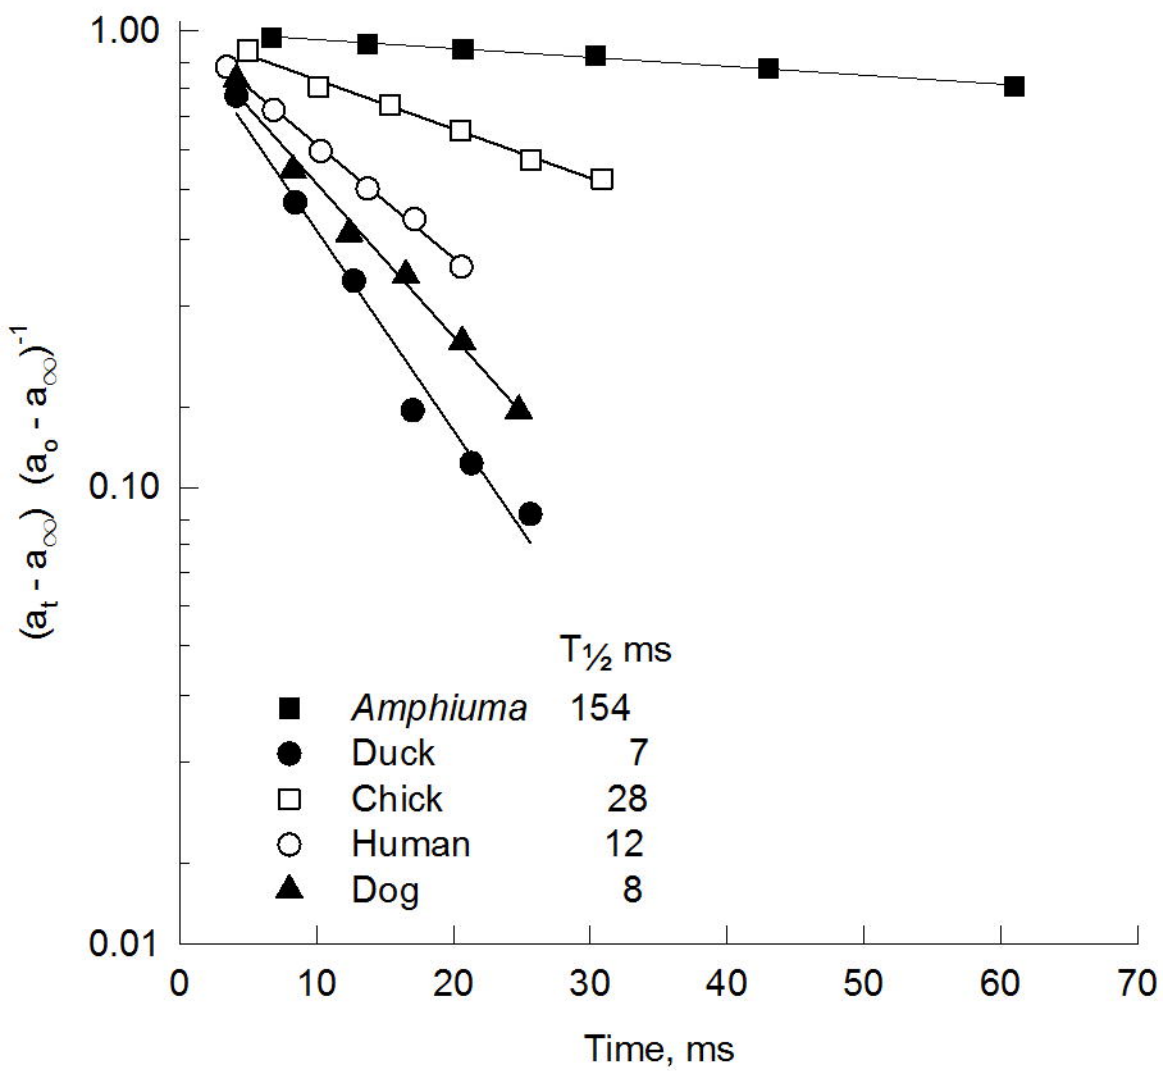

Source: https://cob.silverchair.com/jeb/article-pdf/doi/10.1242/jeb.077941/2036067/jeb_077941.pdf
